# Supplementary material for: Quantum dot cluster (QDC)-loaded phospholipid micelles as a FRET probe for phospholipase A2 detection
Source: Royal Society of Chemistry journal article supplement (doi:10.1039/c5ra25292j), 2016-01-01
Supplement: c5ra25292j1.pdf [file c5ra25292j1.pdf]

## Supporting Information

### Quantum dot cluster (QDC)-loaded phospholipid micelles as FRET probe for phospholipase A<sub>2</sub> detection

Junling Li<sup>1</sup>, Yonghua Zhang<sup>1</sup>, Junjie Ai<sup>1</sup>, Qiang Gao<sup>1\*</sup>, Honglan Qi<sup>1</sup>, Chengxiao  
Zhang<sup>1</sup>, Zhiliang Cheng<sup>2\*</sup>

<sup>1</sup>Key Laboratory of Applied Surface and Colloid Chemistry, Ministry of Education,  
School of Chemistry and Chemical Engineering, Shaanxi Normal University, Xi'an,  
710062, China, <sup>2</sup>Department of Bioengineering, University of Pennsylvania,  
Philadelphia, PA 19104, USA

#### **Corresponding Author**

**\*Qiang Gao**

Tel: 86-29-81530726

Fax: 86-29-81530727

E-mail: [gaoqiang@snnu.edu.cn](mailto:gaoqiang@snnu.edu.cn)

**\*Zhiliang Cheng**

Tel: 215-573-0290

Fax: 215-573-2071

Email: [zcheng@seas.upenn.edu](mailto:zcheng@seas.upenn.edu)

## **Experimental**

### **Synthesis of single quantum dot-loaded phospholipid micelles without NBD**

The single quantum dot-loaded phospholipid micelles without NBD was prepared using an oil-in-water emulsion-based self-assembly method. A mixture containing HSPC (0.88 mg) and QD (1 mg) in 150  $\mu$ L chloroform was injected into a glass vial containing 3 mL of water, and the sample was sonicated until a homogenous mixture was obtained. The chloroform was then allowed to evaporate overnight. Following that, QDC-loaded phospholipid micelles samples were centrifuged at 1000 rpm for 30 minutes to remove large aggregates. To obtain the QDC-loaded micelle without NBD, the resulting supernatant was centrifuged at 3000 rpm for half hour, and the pellet was resuspended in water (1 mL). To obtain the single QD-loaded micelle without NBD, the resulting supernatant was then centrifuged at 10000 rpm for half hour, and the pellet was resuspended in water (1 mL). The collected samples of QDC- and QD-loaded phospholipid micelles were stored in the dark at 4 °C and used for UV-vis (Figure S2) and fluorescence (Figure S3) measurement.

### **Synthesis of NBD-containing liposomes**

The NBD-containing liposome was prepared using an oil-in-water emulsion-based self-assembly method. A mixture containing HSPC (0.88 mg) and NBD PC (0.1 mg) in 150  $\mu$ L chloroform was injected into a glass vial containing 3 mL of water, and the sample was sonicated until a homogenous mixture was obtained. The chloroform was then allowed to evaporate overnight. Following that, NBD-containing liposomes samples were centrifuged at 3000 rpm for 30 minutes to remove large aggregates, the

resulting supernatant was stored in the dark at 4 °C and used for NBD fluorescence measurement (Figure S4).

#### Chemical information

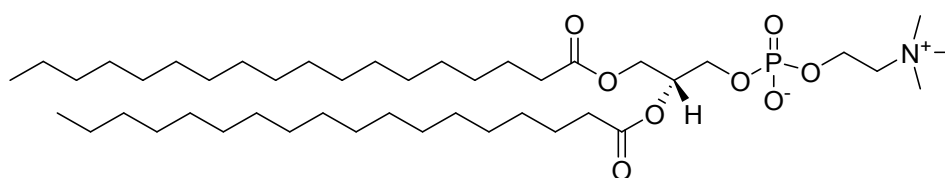

HSPC

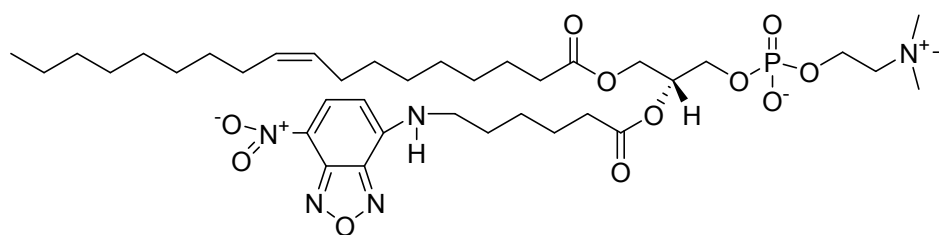

NBD PC

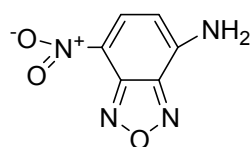

NBD

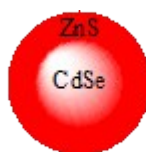

Hydrophobic CdSe/ZnS QD

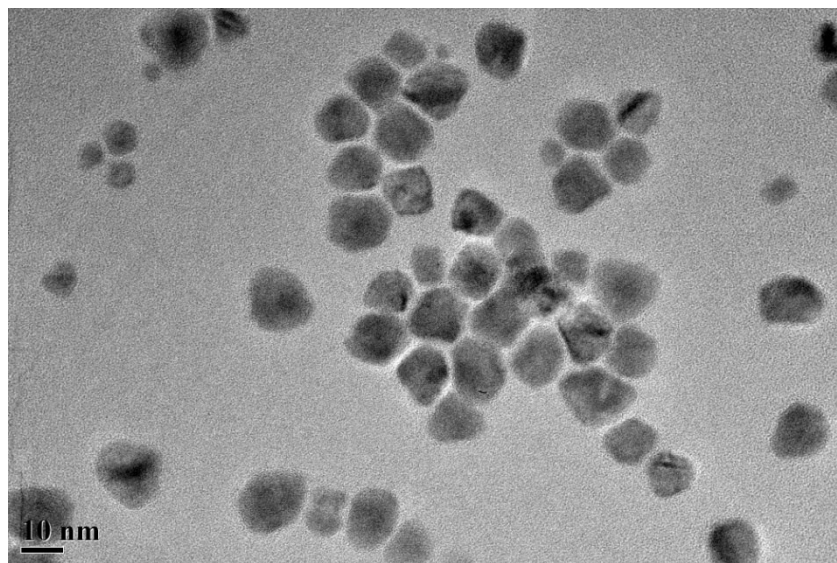

Figure S1 TEM image of single quantum dot-loaded phospholipid micelles.

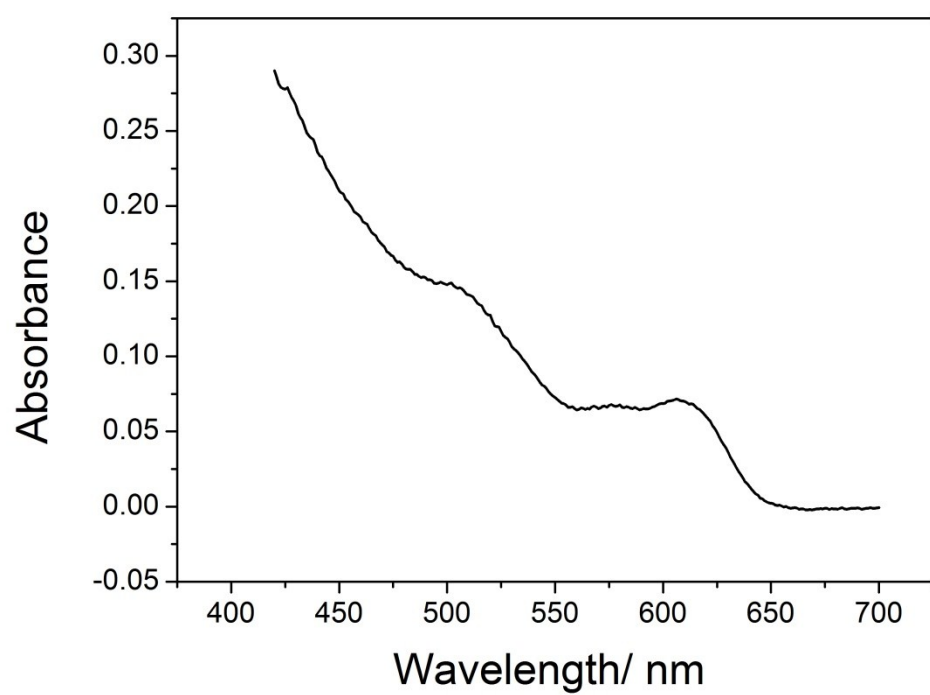

Figure S2 Absorption spectra of single quantum dot-loaded phospholipid micelles  
without NBD.

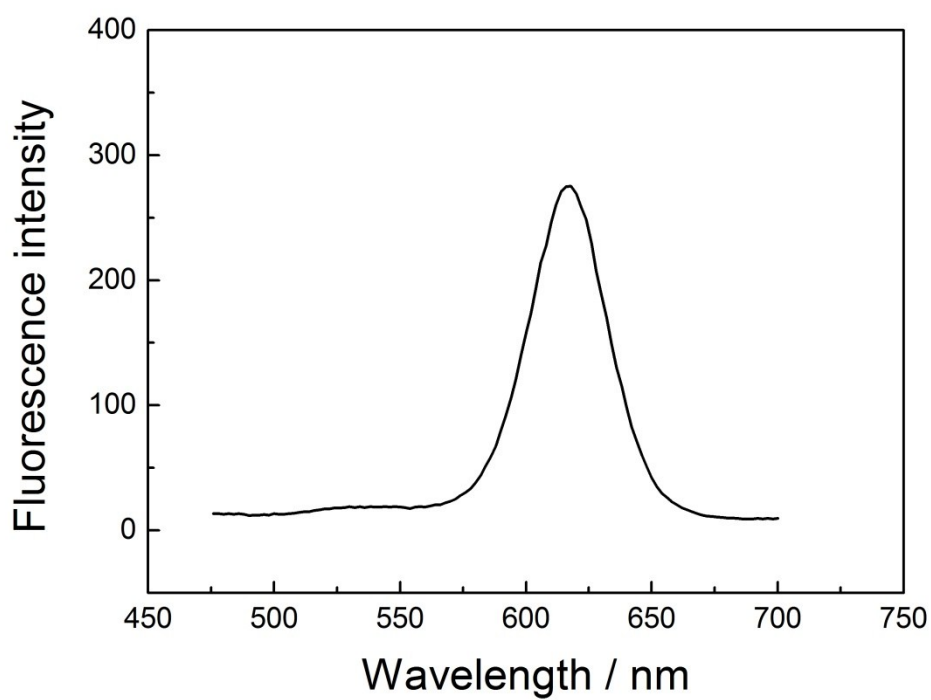

Figure S3. Emission spectra of QDC-loaded phospholipid micelles without NBD. Ex, 460 nm. Aliquots (900  $\mu$ L) of 10.0 mM HEPES buffer (pH 7.4) containing 2.0 mM  $\text{CaCl}_2$  and samples (50  $\mu$ L).

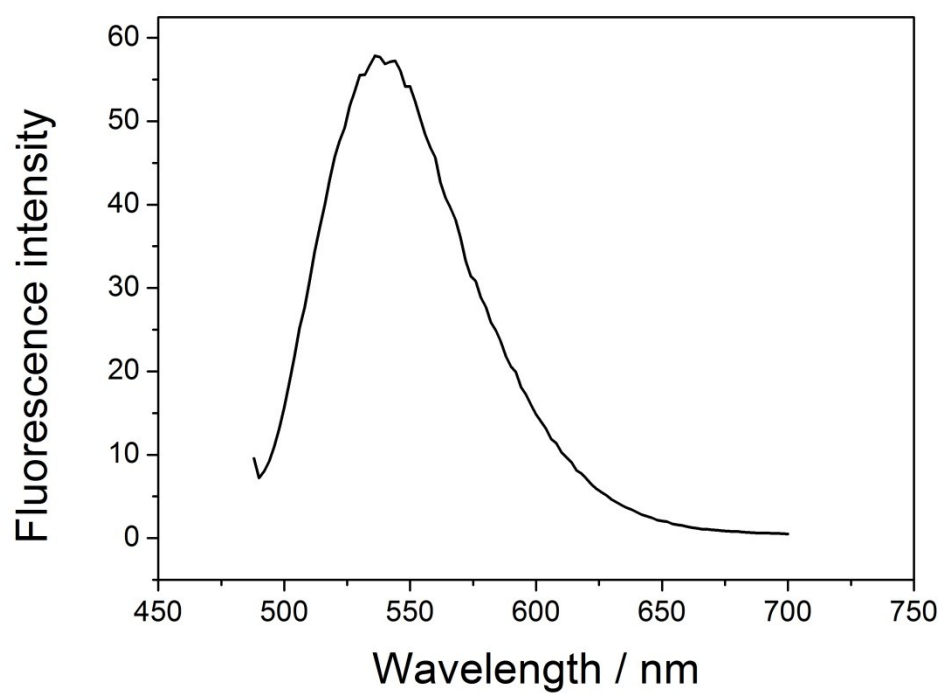

Figure S4. Emission spectra of NBD-containing liposome. Ex, 460 nm. Aliquots (900  $\mu$ L) of 10.0 mM HEPES buffer (pH 7.4) containing 2.0 mM  $\text{CaCl}_2$  and NBD-containing liposomes (50  $\mu$ L).

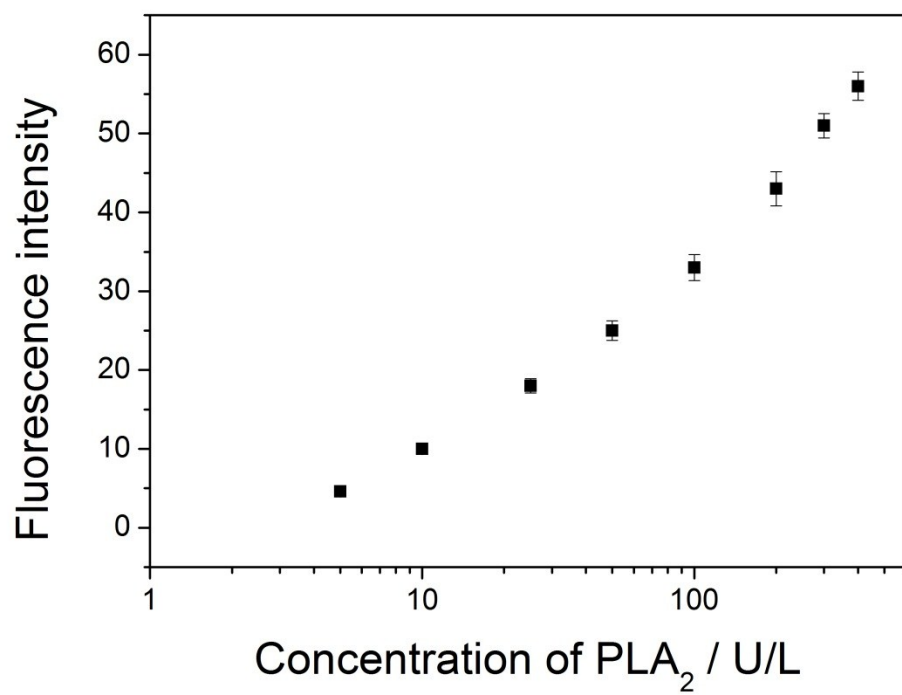

Figure S5 Linear range of the probe for the PLA<sub>2</sub> detection. Concentration of PLA<sub>2</sub>, 5,

10, 25, 50, 100, 200, 300, 400 U/L. Ex, 460 nm, Em, 545 nm.



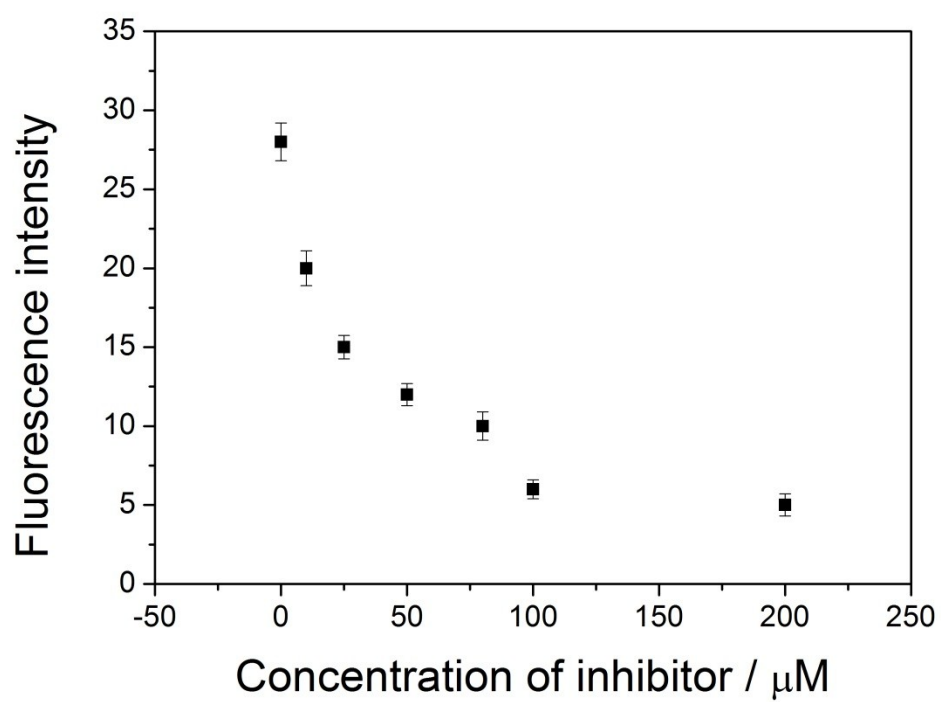

Figure S6 Dependence of fluorescence intensity on inhibitor LY311727 concentrations. Concentrations of inhibitor LY311727: 0, 10  $\mu\text{M}$ , 25  $\mu\text{M}$ , 50  $\mu\text{M}$ , 80  $\mu\text{M}$ , 100  $\mu\text{M}$ , 200  $\mu\text{M}$ . The concentration of  $\text{PLA}_2$ , 50 unit/L.
